# Supplementary material for: Enhanced electroactivity and substrate affinity of microperoxidase-11 attached to pyrene-linkers π–π stacked on carbon nanostructure electrodes
Source: Royal Society of Chemistry journal article supplement (doi:10.1039/c4ra14361b), 2015-01-01
Supplement: c4ra14361b1.pdf [file c4ra14361b1.pdf]

## Supporting information

### **Enhanced Electroactivity and Substrate Affinity of Microperoxidase-11 Attached to Pyrene-linkers $\pi$ - $\pi$ Stacked on Carbon Nanostructure Electrodes**

K. Sudhakara Prasad, Charuksha Walgama, and Sadagopan Krishnan\*

Department of Chemistry, Oklahoma State University, Stillwater, OK, USA- 74078.

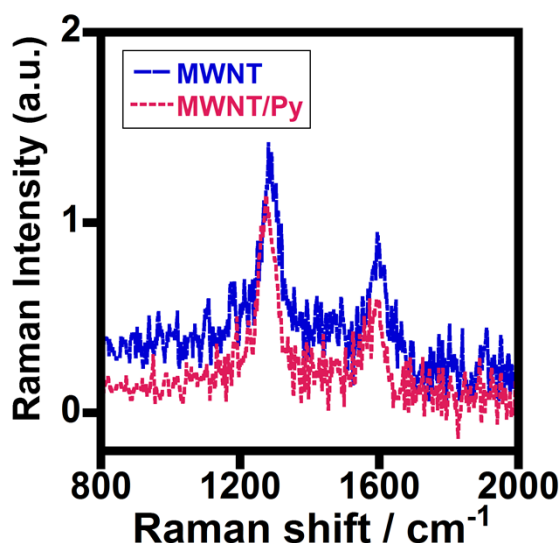

**Fig. S1.** Raman spectra of MWNT and MWNT/Py films on HPG electrodes.

**FTIR Characterization.** The HPG electrode and MWNT showed the carbonyl vibration peaks at 1660 cm<sup>-1</sup> (Figure S2). The FTIR spectra were taken after each modification step on HPG electrodes (Figure S2). MP-11 exhibited peaks between the regions 1500-1600 and 1600-1700 cm<sup>-1</sup>, which were assigned to the amide-I C=O and the amide-II N-H bending frequencies typical of a peptide backbone.<sup>1-2</sup> The free amine groups of MP-11 vibration bands (Lys-13 and N-terminus Val-11) were assigned at 1627 cm<sup>-1</sup>. MWNT/Py modified HPG electrodes exhibited bands at 1665 cm<sup>-1</sup> for carbonyl stretching and a broad band at 3480 cm<sup>-1</sup> for the -OH stretching, both are attributed to the end -COOH groups of the Py-linker molecules.

The EDC-NHS treatment of MWNT/Py assemblies led to the disappearance of the -OH stretching band of -COOH (originally appeared at 3480 cm<sup>-1</sup>) due to its conversion to N-succinimidyl groups and the appearance of new peaks centered at 1452 and 1769 cm<sup>-1</sup> were attributed to C-N and C=O stretchings, respectively.<sup>3,3</sup> The IR-spectrum obtained after the covalent bonding of MP-11 to MWNT/Py assemblies depicted characteristic bands for peptide amide-I and amide-II bonds in the region of 1500 to 1700 cm<sup>-1</sup>. Additionally the appearance of bands in the region of 3270 to 3400 cm<sup>-1</sup> represent the amide A and B bonds of MP-11.<sup>2</sup> Taken together, the FTIR characterization confirmed the covalent immobilization of MP-11 to MWNT/Py units on HPG electrodes (Figure S3).

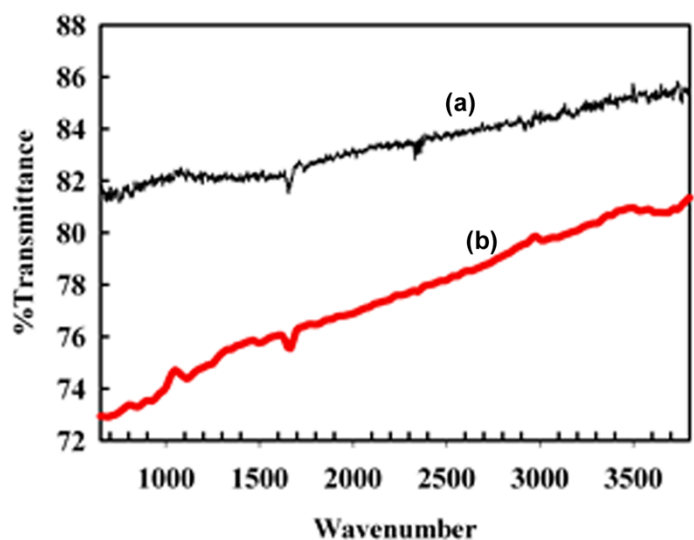

**Fig. S2.** FTIR spectra of (a) only HPG and (b) only MWNT.

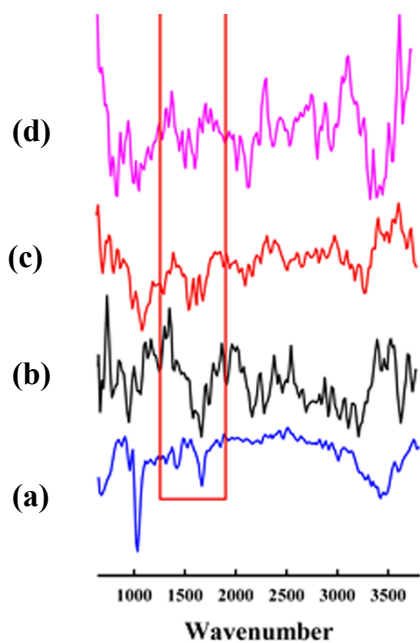

**Fig. S3.** FTIR spectra of (a) MWNT/Py; (b) EDC-NHS treated MWNT/Py; (c) MP11-amine<sub>cov</sub> films; and (d) only MP-11.

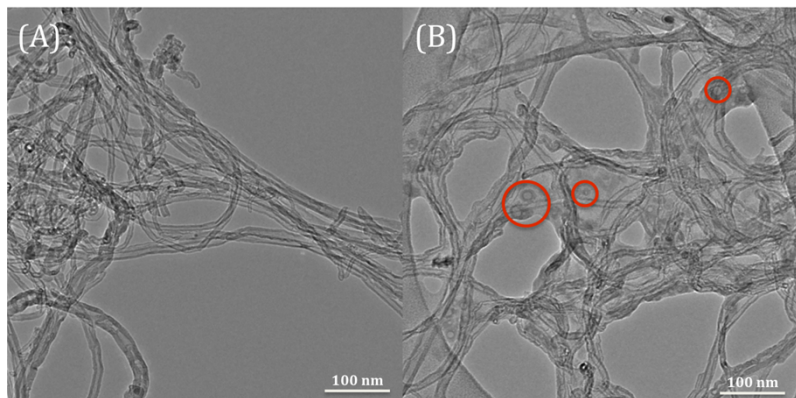

**Fig. S4.** TEM images for (A) MWNT/Py and (B) MP11-amine<sub>cov</sub> films (MP-11 features around the tubes are circled).

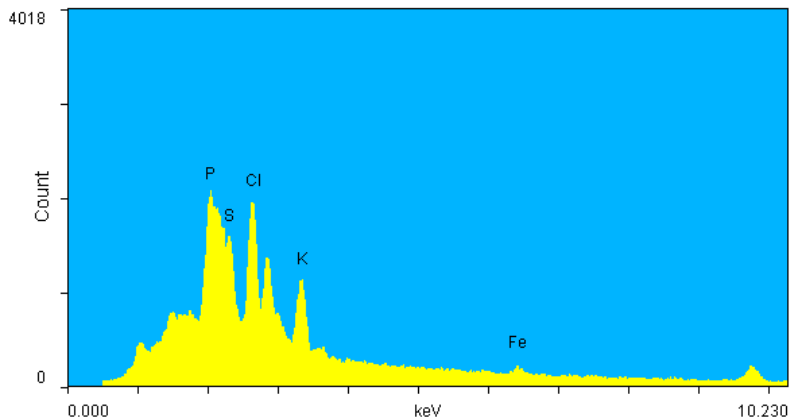

**Fig. S5.** EDS of the MP11-amine<sub>cov</sub> film. The presence of P, K, and Cl peaks is attributed to arise from PBS.

**Table S1.** Comparison of the electroactive MP-11 amounts on MWNT/Py electrodes with control films and the reported myoglobin-amine<sub>cov</sub> film.

| MP-11 Film                     | $\Gamma$ / $\mu\text{mol cm}^{-2}$ | Ref.       |
|--------------------------------|------------------------------------|------------|
| MP11-amine <sub>cov</sub>      | $2385 \pm 103$                     |            |
| HPG/MWNT-MP11                  | $1250 \pm 66$                      | This study |
| HPG/MP11                       | $619 \pm 28$                       |            |
| HPG/Py-MP11                    | $746 \pm 30$                       |            |
| myoglobin-amine <sub>cov</sub> | $300 \pm 60$                       | 4          |

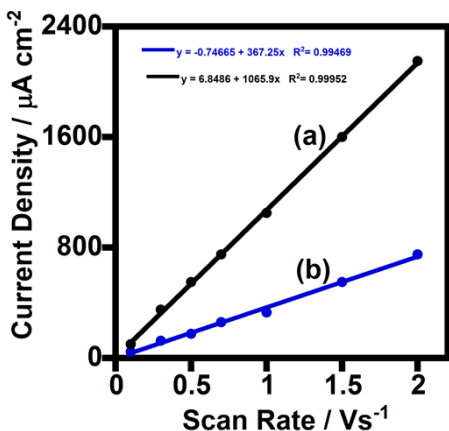

**Fig. S6.** Current density versus scan rate plot for the charging currents measured for (a) HPG/MWNT/Py electrode and (b) polished HPG electrode in the absence of immobilized MP-11.

#### Calculation of the direct electron transfer rate constant of MP11-amine<sub>cov</sub> films.

$$E_{pc} = \left[ E^0 - \frac{RT}{\alpha nF} \ln \left( \frac{\alpha nF}{RTk_s} \right) \right] - \frac{RT}{\alpha nF} \ln(v) \quad (1)$$

$$E_{pa} = \left[ E^0 + \frac{RT}{(1-\alpha)nF} \ln \left( \frac{(1-\alpha)nF}{RTk_s} \right) \right] + \frac{RT}{(1-\alpha)nF} \ln(v) \quad (2)$$

$$\Delta E_p = \frac{2.3RT}{\alpha(1-\alpha)nF} \left[ \alpha \log(1-\alpha) + (1-\alpha) \log \alpha - \log k_s - \log \left( \frac{RT}{nF} \right) \right] + \frac{2.3RT}{\alpha(1-\alpha)nF} \log(v) \quad (3)$$

Where  $E^0$  is the formal potential,  $\alpha$  is the electron-transfer coefficient,  $k_s$  is the heterogeneous electron transfer rate constant for a surface confined redox process,  $v$  is the scan rate, and  $n$  is the number of electrons transferred ( $n=1$  for MP11-heme). The average value of the transfer coefficient for the MP11-amine<sub>cov</sub> film was calculated using the slopes of the plots of  $E_{pa}$ ,  $E_{pc}$ , versus  $\ln(v)$  according to Equations 1 and 2. Then Equation 3 was used to plot  $\Delta E_p$  values against  $\log(v)$  to obtain the  $k_s$  value (Figure S7).<sup>5</sup>

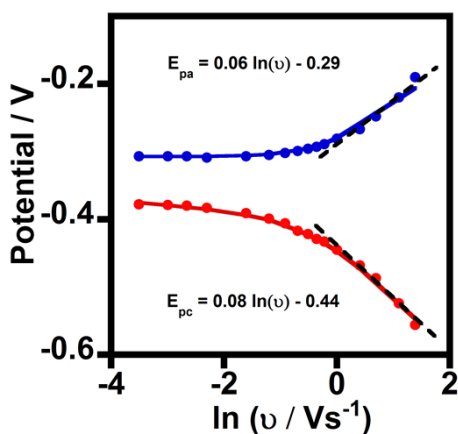

**Fig. S7.** Relationship between peak potentials ( $E_p$ ) and natural logarithm of scan rate for MP11-amine<sub>cov</sub> films at pH 7.4, PBS. The linear fit lines at higher scan rates and the corresponding equations are shown.

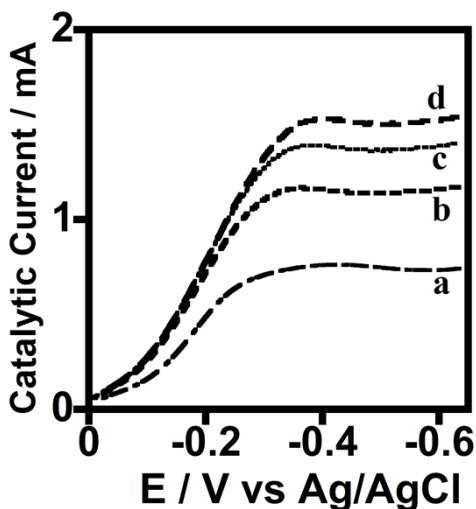

**Fig. S8.** Reduction currents versus t-BuOOH concentration at 1000 rpm catalyzed by the MP11-amine<sub>cov</sub> film in pH 7.4 PBS for **a.** 0.8, **b.** 1.6, **c.** 3.2, and **d.** 4.8 mM t-BuOOH.

1 M. F. Cabral, J. D. Barrios, E. M. Kataoka, S. A. S. Machado, E. Carrilho, C. D. Garcia and A. A. Ayon, *Colloids Surf. B*, 2013, **103**, 624– 629.

2 A. Barth, *Prog. Biophys. Mol. Bio.*, 2000, **74**, 141-173.

3 F. Zhang, X. Chen, R. A. Boulos, F. M. Yasin, H. Lu, C. Raston and H. Zhang, *Chem.*

---

*Commun.*, 2013, **49**, 4845-4847.

4 C. Walgama and S. Krishnan, *J. Electrochem. Soc.*, 2014, **161**, H47-H52.

5 S. Ray, S. Chand, Y. Zhang, S. Nussbaum, K. Rajeshwar and R. Perera, *Electrochim. Acta*, 2013, **99**, 85-93.
